# Supplementary material for: Time Series Transcriptome Analysis in Medicago truncatula Shoot and Root Tissue During Early Nodulation
Source: PubMed Central journal article supplement (PMC9021838; doi:10.3389/fpls.2022.861639), 2022-04-07
Supplement: Image_1.pdf [file Image_1.pdf]

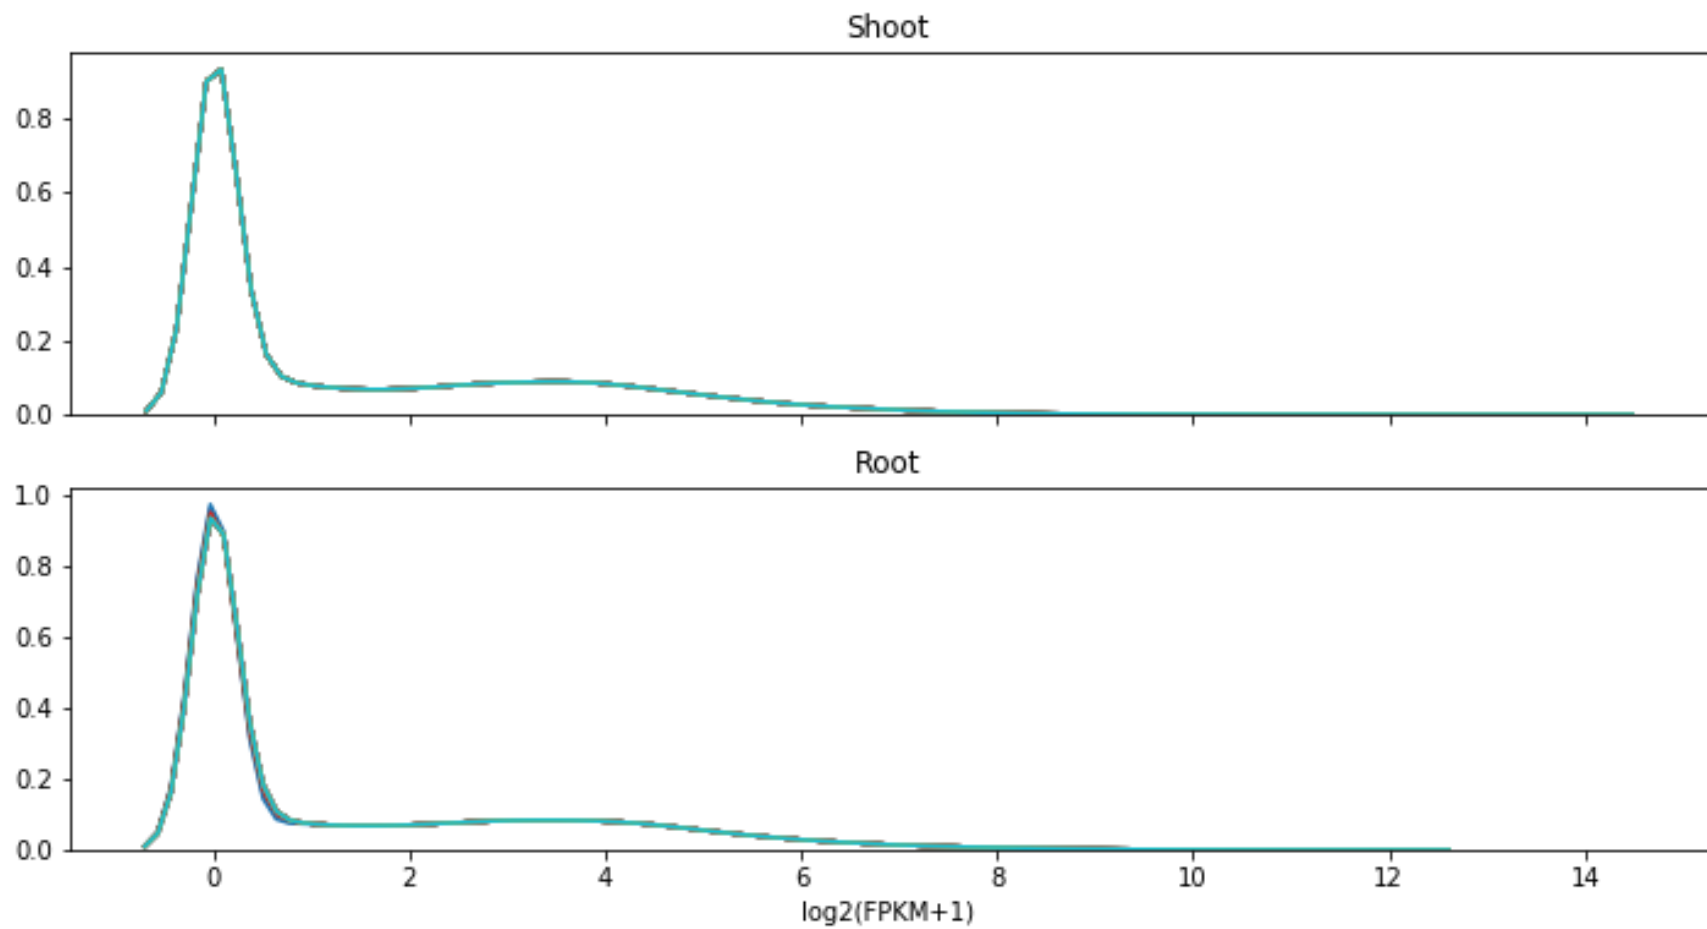

**Supplemental Figure 1.** Sample distribution for *Medicago truncatula* root and shoot gene expression matrices.
